# Supplementary material
Source: PubMed Central journal article supplement (PMC2905461)

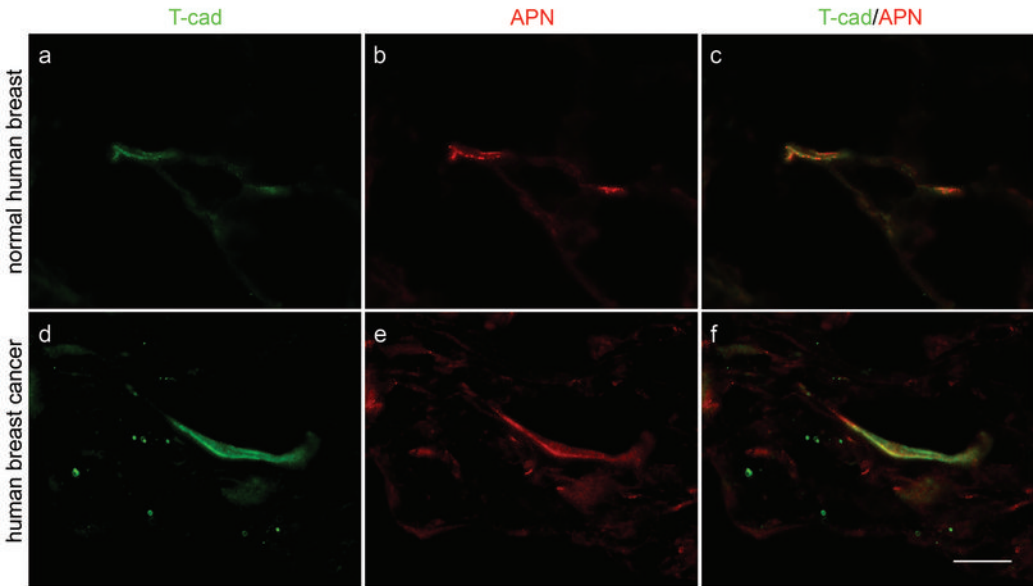

Supplement: NIHMS113873-supplement-1.pdf [file NIHMS113873-supplement-1.pdf]
